# Supplementary material for: Shedding light on the soft and efficient free radical induced reduction of graphene oxide: hidden mechanisms and energetics
Source: Royal Society of Chemistry journal article supplement (doi:10.1039/c6ra13085b), 2016-01-01
Supplement: c6ra13085b1.pdf [file c6ra13085b1.pdf]

Supporting Information

**Shedding Light into the Soft and Efficient Free Radical Induced Reduction  
of Graphene Oxide: Hidden Mechanisms and Energetics**

*Axel Kahnt\*<sup>¶</sup>, Roman Flyunt<sup>†</sup>, Sergej Naumov<sup>†</sup>, Wolfgang Knolle<sup>†</sup>, Siegfried Eigler<sup>‡</sup><sup>⊥</sup>, Ralf  
Hermann<sup>§</sup>, Bernd Abel\*<sup>§</sup><sup>†</sup>*

<sup>¶</sup> Department of Chemistry and Pharmacy & Interdisciplinary Center for Molecular Materials,  
Chair of Physical Chemistry I, Friedrich-Alexander-Universität Erlangen-Nürnberg,  
Egerlandstrasse 3, 91058 Erlangen, Germany.

<sup>†</sup> Leibniz Institute of Surface Modification (IOM), Chemical Department, Permoserstr. 15,  
04318 Leipzig, Germany, Permoserstr. 15, D-04303 Leipzig, Germany;

<sup>‡</sup> Department of Chemistry and Pharmacy, Institute of Advanced Materials and Processes  
(ZMP), Friedrich-Alexander-Universität Erlangen-Nürnberg (FAU), Henkestr. 42, 91054  
Erlangen and Dr.-Mack Str. 81, 90762 Fürth, Germany

<sup>⊥</sup> Department of Chemistry and Chemical Engineering / Organic Chemistry, Chalmers  
University of Technology, 41296 Göteborg, Sweden

<sup>§</sup> Wilhelm-Ostwald-Institute for Physical and Theoretical Chemistry, Universität Leipzig,  
Linne-Strasse 2, 04103 Leipzig, Germany

## Supporting Information

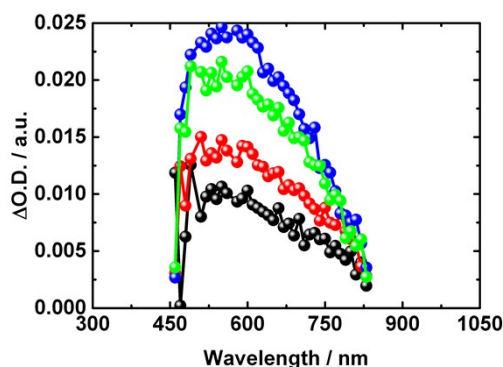

**Figure S1.** Differential absorption spectra obtained upon electron pulse radiolysis (100 Gy, 15 ns FWHM) of  $0.8 \text{ mg} \times \text{ml}^{-1}$  **oxo-G<sub>1</sub>** in  $\text{N}_2\text{O}$  saturated aqueous solution in containing with time delays of 5  $\mu\text{s}$  (black spectrum), 10  $\mu\text{s}$  (red spectrum), 25  $\mu\text{s}$  (green spectrum) and 50  $\mu\text{s}$  (blue spectrum) after the electron pulse.

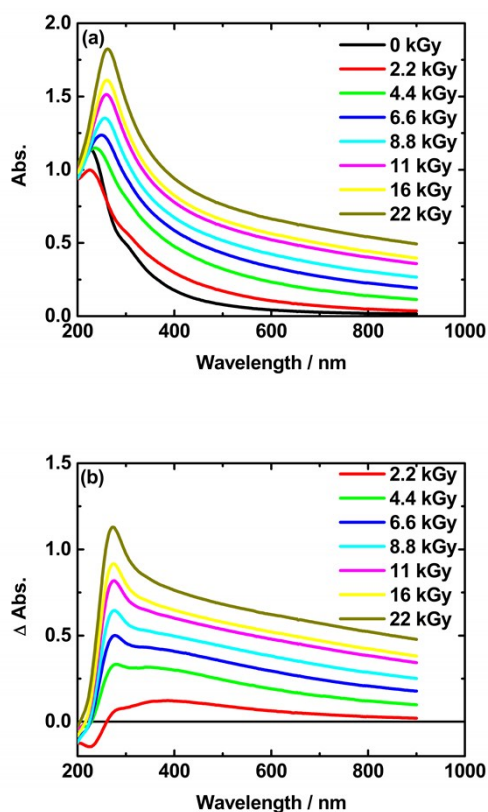

**Figure S2.** a) UV-Vis spectra of nitrogen saturated aqueous **CT-GO** solutions (0.4 mg/ml) containing 2 wt% 2-propanol upon electron beam radiation with different absorbed radiation doses. The samples were diluted with water (1:9) after irradiation and measuring the UV-vis spectra in order keep the absorption in a reasonable measurable range. b) Corresponding change in absorption obtained from the spectra in (a) by subtracting the spectra before irradiation from the spectra measured after irradiation.

### Supporting Information

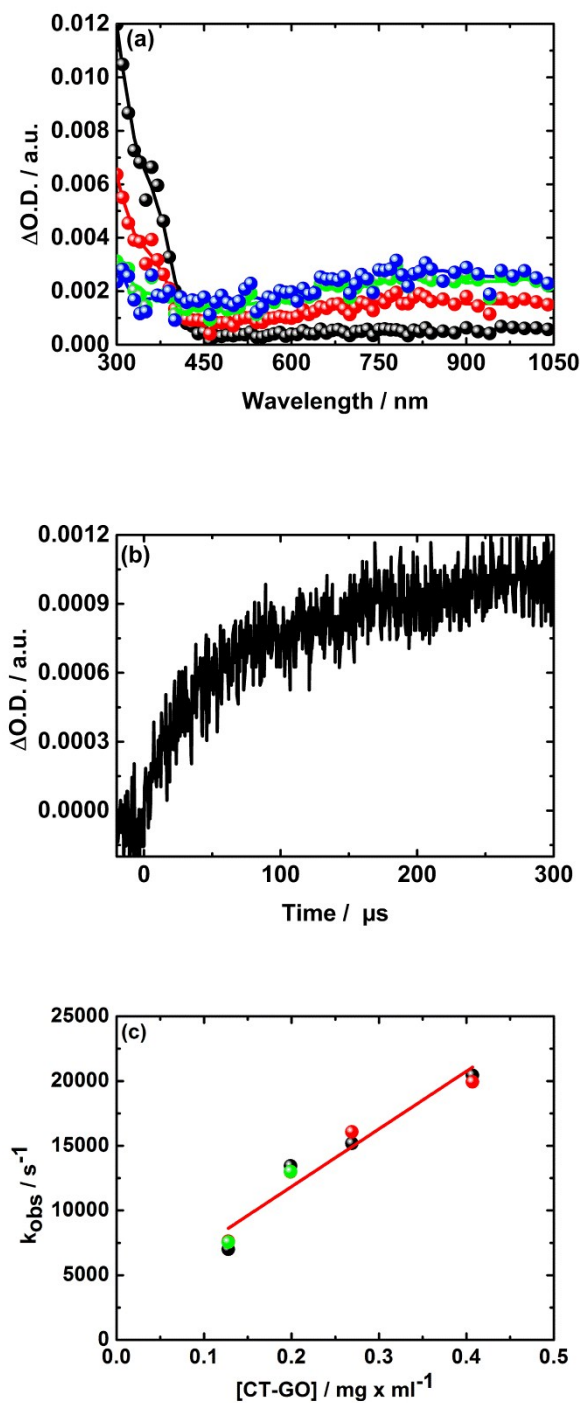

**Figure S3.** (a): Differential absorption spectra obtained upon electron pulse radiolysis (100 Gy, 15 ns FWHM) of  $0.13 \text{ mg} \times \text{ml}^{-1}$  **CT-GO** in  $\text{N}_2\text{O}$  saturated aqueous solution in containing of  $5 \times 10^{-3} \text{ M}$   $\text{HCOONa}$  with time delays of  $10 \text{ } \mu\text{s}$  (black spectrum),  $50 \text{ } \mu\text{s}$  (red spectrum),  $200 \text{ } \mu\text{s}$  (green spectrum) and  $300 \text{ } \mu\text{s}$  (blue spectrum) after the electron pulse. (b): Corresponding absorption time profiles at  $700 \text{ nm}$ . (c): Plot of the pseudo-first-order rate constants taken from the  $700 \text{ nm}$  absorption time profiles vs. the **CT-GO** concentration measured with an absorbed dose of  $100 \text{ Gy} / \text{pulse}$  (black),  $50 \text{ Gy} / \text{pulse}$  (red) and  $20 \text{ Gy} / \text{pulse}$  (green).

## Supporting Information

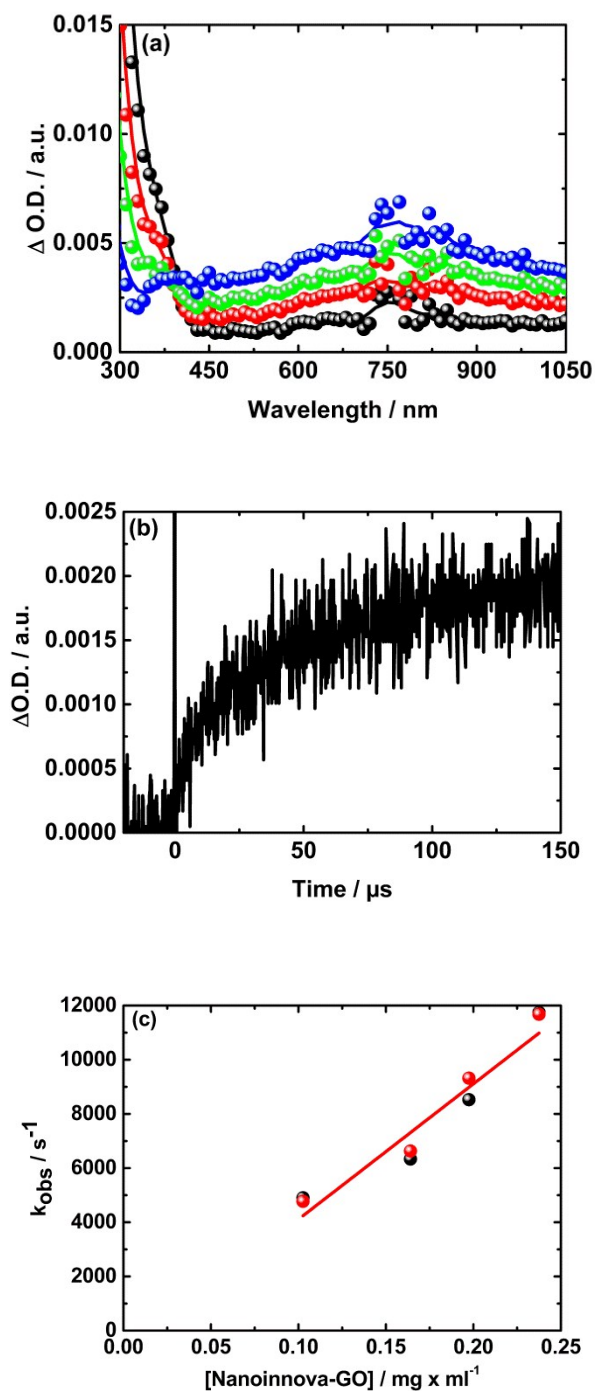

**Figure S4.** (a): Differential absorption spectra obtained upon electron pulse radiolysis (100 Gy, 15 ns FWHM) of 0.10 mg x ml<sup>-1</sup> **NI-GO** in N<sub>2</sub>O saturated aqueous solution in containing of 5 x 10<sup>-3</sup> M HCOONa with time delays of 5 μs (black spectrum), 20 μs (red spectrum), 50 μs (green spectrum) and 150 μs (blue spectrum) after the electron pulse. (b): Corresponding absorption time profiles at 700 nm. (c): Plot of the pseudo-first-order rate constants taken from the 700 nm absorption time profiles vs. the **NI-GO** concentration measured with an absorbed dose of 50 Gy / pulse (red) and 20 Gy / pulse (black).

## Supporting Information

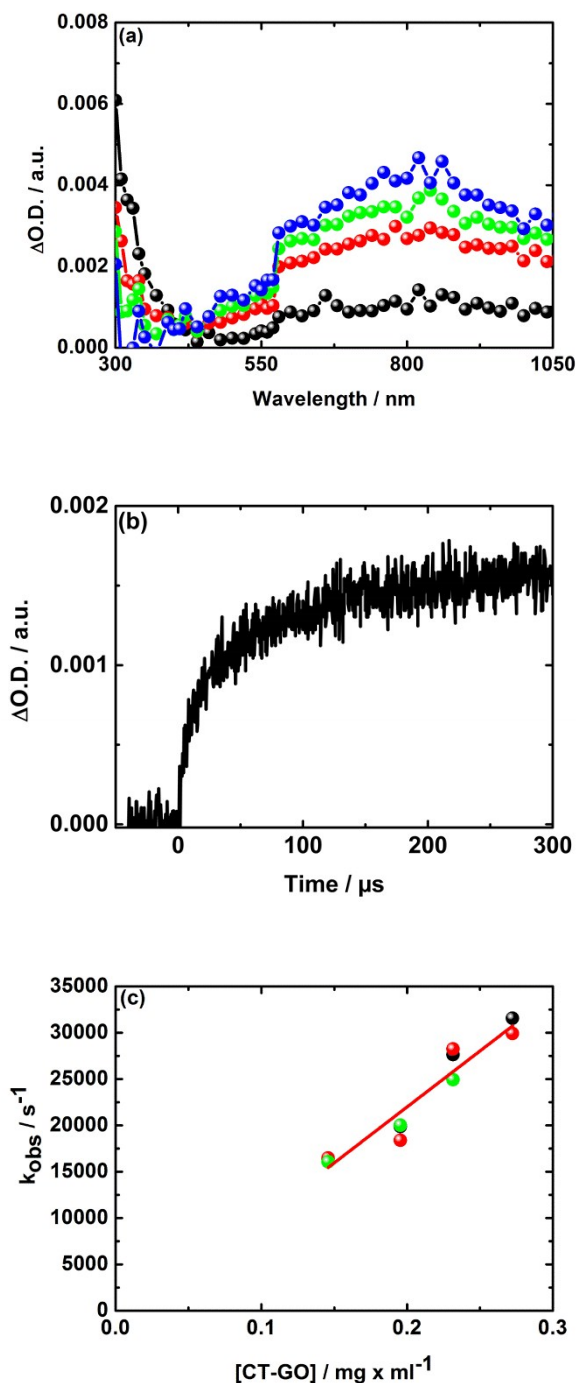

**Figure S5.** (a): Differential absorption spectra obtained upon electron pulse radiolysis (100 Gy, 15 ns FWHM) of  $0.15 \text{ mg} \times \text{ml}^{-1}$  CT-GO in  $N_2O$  saturated aqueous solution in the presence of 5 vol% 2-propanol with time delays of 15  $\mu s$  (black spectrum), 50  $\mu s$  (red spectrum), 100  $\mu s$  (green spectrum) and 250  $\mu s$  (blue spectrum) after the electron pulse. (b): Corresponding absorption time profiles at 700 nm. (c): Plot of the pseudo-first-order rate constants taken from the 700 nm absorption time profiles vs. the CT-GO concentration measured with an absorbed dose of 100 Gy / pulse (black), 50 Gy / pulse (red) and 20 Gy / pulse (green).

## Supporting Information

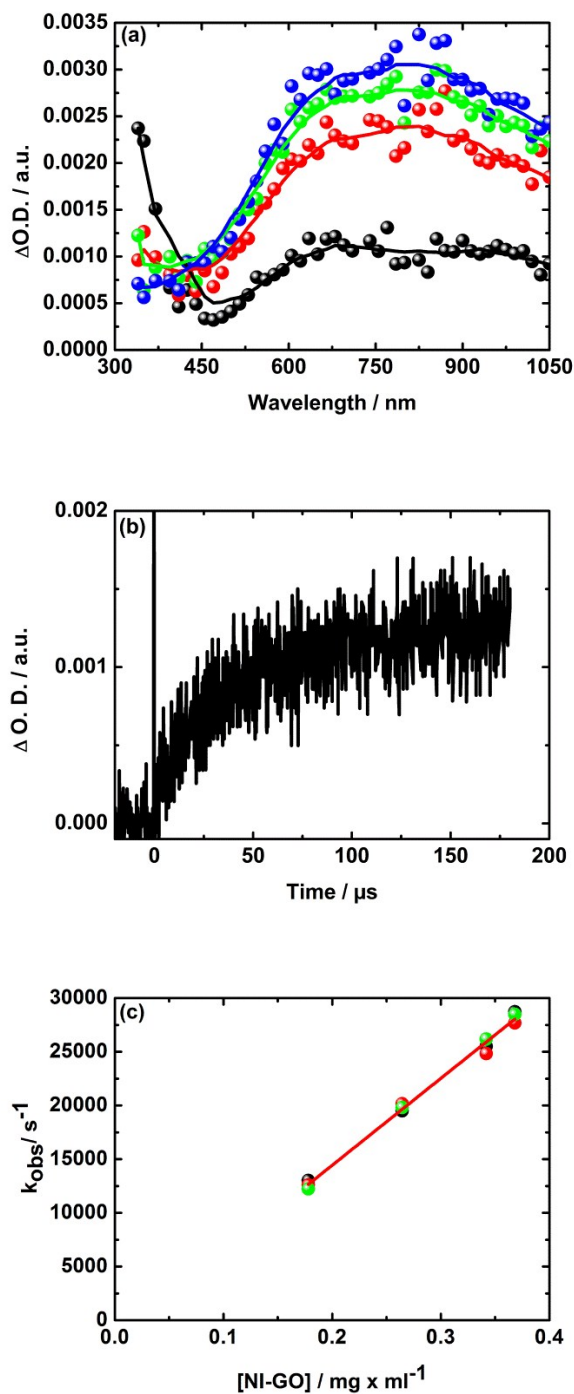

**Figure S6.** (a): Differential absorption spectra obtained upon electron pulse radiolysis (100 Gy, 15 ns FWHM) of  $0.34 \text{ mg} \times \text{ml}^{-1}$  NI-GO in  $N_2O$  saturated aqueous solution in the presence of 5 vol% 2-propanole with time delays of 10  $\mu s$  (black spectrum), 50  $\mu s$  (red spectrum), 100  $\mu s$  (green spectrum) and 150  $\mu s$  (blue spectrum) after the electron pulse. (b): Corresponding absorption time profiles at 700 nm. (c): Plot of the pseudo-first-order rate constants taken from the 700 nm absorption time profiles vs. the NI-GO concentration, measured with an absorbed dose of 100 Gy / pulse (black), 50 Gy / pulse (red) and 20 Gy / pulse (green).
